# Supplementary material for: Hypoxylonol F Isolated from Annulohypoxylon annulatum Improves Insulin Secretion by Regulating Pancreatic β-cell Metabolism
Source: PubMed Central journal article supplement (PMC6723394; doi:10.3390/biom9080335), 2019-08-02
Supplement: biomolecules-09-00335-s001.pdf [file biomolecules-09-00335-s001.pdf]

# Hypoxylonol F isolated from *Annulohypoxyton annulatum* improves insulin secretion by regulating pancreatic $\beta$ -cell metabolism

Dahae Lee<sup>1,2,†</sup>, Buyng Su Hwang<sup>3,†</sup>, Pilju Choi<sup>4,†</sup>, Taejung Kim<sup>4</sup>, Youngseok Kim<sup>4</sup>, Bong Geun Song<sup>4</sup>, Noriko Yamabe<sup>2</sup>, Gwi Seo Hwang<sup>2</sup>, Ki Sung Kang<sup>2,\*</sup> and Jungyeob Ham<sup>3,5,\*</sup>

- <sup>1</sup> School of Pharmacy, Sungkyunkwan University, Suwon 16419, Korea; pjsldh@naver.com (D.L.)
- <sup>2</sup> College of Korean Medicine, Gachon University, Seongnam 13120, Korea; norikoy@gachon.ac.kr (N.Y.); seoul@gachon.ac.kr (G.S.H.)
- <sup>3</sup> Freshwater Bioresources Utilization Bureau, Nakdonggang National Institute of Biological Resources, Sangju 37242, Korea; hwang1531@nnibr.re.kr (B.S.H.)
- <sup>4</sup> Natural Products Research Institute, Korea Institute of Science and Technology, Gangneung 25451, Korea; 112074@naver.com (P.C.); kgsing@kist.re.kr (T.K.); 114036@kist.re.kr (Y.K.); t16374@kist.re.kr (B.G.S.)
- <sup>5</sup> Division of Bio-Medical Science and Technology, University of Science and Technology, Daejeon 34114, Korea
- \* Correspondence: kkang@gachon.ac.kr; Tel.: +82-31-750-5402 (K.S.K.) and ham0606@kist.re.kr; Tel.: +82-33-650-3502 (J.H.)

## Contents

|                                                                                                                                                                              |    |
|------------------------------------------------------------------------------------------------------------------------------------------------------------------------------|----|
| Characterization data.....                                                                                                                                                   | 2  |
| Scheme S1. Fractionation schemes of <i>Annulohypoxyton annulatum</i> .....                                                                                                   | 3  |
| Figure S1. HPLC chromatograms of <i>Annulohypoxyton annulatum</i> extract (A), Hypoxylonol C (B), Hypoxylonol F (C), BNT (D).....                                            | 4  |
| Figure S2. <sup>1</sup> H NMR NMR spectrum of hypoxylonol C (1).....                                                                                                         | 5  |
| Figure S3. <sup>13</sup> C NMR NMR spectrum of hypoxylonol C (1).....                                                                                                        | 5  |
| Figure S4. HRMS of hypoxylonol C (1).....                                                                                                                                    | 6  |
| Figure S5. <sup>1</sup> H NMR NMR spectrum of hypoxylonol F (2).....                                                                                                         | 7  |
| Figure S6. <sup>13</sup> C NMR NMR spectrum of hypoxylonol F (2).....                                                                                                        | 7  |
| Figure S7. HRMS of hypoxylonol F (2).....                                                                                                                                    | 8  |
| Figure S8. <sup>1</sup> H NMR NMR spectrum of BNT (3).....                                                                                                                   | 9  |
| Figure S9. <sup>13</sup> C NMR NMR spectrum of BNT (3).....                                                                                                                  | 9  |
| Figure S10. HRMS of BNT (3).....                                                                                                                                             | 10 |
| Figure S11. Effect of hypoxylonol F (2) on the protein expression levels of PPAR $\gamma$ , P-IRS-2, IRS-2, P-PI3K, PI3K, P-Akt (Ser473), Akt, and PDX-1 in INS-1 cells..... | 11 |

## Characterization data

### Hypoxydonol C (1).

Yellow amorphous powder.  $^1\text{H}$  NMR (400 MHz, acetone- $d_6$ )  $\delta$  12.61 (s, 1H, OH-9), 8.65 (s, 1H, OH-4), 7.56 (t, 1H,  $J$  = 8.0 Hz, H-11), 7.49 (dd, 1H,  $J$  = 8.0, 1.2 Hz, H-12), 7.28 (d, 1H,  $J$  = 8.0 Hz, H-6), 6.84 (dd, 1H,  $J$  = 8.0, 1.2 Hz, H-10), 6.68 (d, 1H,  $J$  = 8.0 Hz, H-5), 5.59 (dd, 1H,  $J$  = 8.5, 4.2 Hz, H-1), 5.48 (m, 1H, H-3), 5.14 (brd, 1H, OH-3), 4.28 (s, 1H, OH-1), 4.11 (dd, 1H,  $J$  = 13.8, 5.5 Hz, H-6b), 3.38 (dd, 1H,  $J$  = 16.5, 5.6 Hz, H-7), 2.47 (dt, 1H,  $J$  = 13.0, 4.3 Hz, H-2), 2.31 (dd, 1H,  $J$  = 16.4, 14.0 Hz, H-7), 2.14 (ddd, 1H,  $J$  = 13.0, 8.5, 3.2 Hz, H-2);  $^{13}\text{C}$  NMR (100 MHz, acetone- $d_6$ )  $\delta$  206.2 (C-8), 163.8 (C-9), 155.9 (C-4), 144.3 (C-12d), 139.6 (C-12a), 138.3 (C-12c), 137.9 (C-12b), 137.7 (C-11), 136.6 (C-6a), 123.7 (C-6), 120.8 (C-3a), 119.0 (C-12), 117.2 (C-10), 115.7 (C-8a), 114.4 (C-5), 65.5 (C-3), 62.8 (C-1), 49.9 (C-6b), 43.7 (C-7), 42.4 (C-2); HRFABMS  $m/z$  335.0925  $[\text{M-H}]^-$  (calcd for  $\text{C}_{20}\text{H}_{15}\text{O}_5$ , 335.0919).

### Hypoxydonol F (2).

Yellow amorphous powder.  $^1\text{H}$  NMR (400 MHz, acetone- $d_6$ )  $\delta$  12.60 (s, 1H, OH-9), 7.53 (t, 1H,  $J$  = 8.0 Hz, H-11), 7.48 (dd, 1H,  $J$  = 8.0, 1.2 Hz, H-12), 7.29 (d, 1H,  $J$  = 8.0 Hz, H-6), 6.82 (dd, 1H,  $J$  = 8.0, 1.2 Hz, H-10), 6.69 (d, 1H,  $J$  = 8.0 Hz, H-5), 5.38 (d, 1H,  $J$  = 8.5 Hz, H-1), 5.11 (d, 1H,  $J$  = 8.5 Hz, H-3), 4.09 (dddd, 1H,  $J$  = 13.8, 5.4, 23.9, 0.7 Hz, H-6b), 3.39 (dd, 1H,  $J$  = 16.4, 5.5 Hz, H-7), 2.47 (dt, 1H,  $J$  = 12.6, 4.3 Hz, H-2), 2.34 (dd, 1H,  $J$  = 16.3, 13.8 Hz, H-7), 2.24 (dt, 1H,  $J$  = 12.6, 8.5 Hz, H-2);  $^{13}\text{C}$  NMR (100 MHz, acetone- $d_6$ )  $\delta$  206.3 (C-8), 163.6 (C-9), 155.7 (C-4), 144.2 (C-12d), 139.4 (C-12a), 139.0 (C-12c), 137.5 (C-12b), 137.1 (C-11), 136.6 (C-6a), 123.8 (C-6), 121.0 (C-3a), 120.9 (C-12), 117.0 (C-10), 115.8 (C-8a), 114.6 (C-5), 67.0 (C-3), 65.2 (C-1), 50.1 (C-6b), 43.7 (C-7), 43.3 (C-2); HRFABMS  $m/z$  337.1074  $[\text{M+H}]^+$  (calcd for  $\text{C}_{20}\text{H}_{17}\text{O}_5$ , 337.1076).

### 4,5,4',5'-Tetrahydroxy-1,1'-binaphthyl, BNT (3).

Yellow amorphous powder.  $^1\text{H}$  NMR (400 MHz, acetone- $d_6$ )  $\delta$  11.04 (br d, 4H, OH-4, 5), 7.16 (d, 2H,  $J$  = 8.0 Hz, H-7), 7.07 (t, 2H,  $J$  = 8.0 Hz, H-2), 6.83 (d, 2H,  $J$  = 8.0 Hz, H-3), 6.72 (dd, 2H,  $J$  = 8.0, 1.3 Hz, H-6), 6.59 (d, 2H,  $J$  = 8.0, 1.3 Hz, H-8);  $^{13}\text{C}$  NMR (100 MHz, acetone- $d_6$ )  $\delta$  155.4 (C-5), 154.8 (C-4), 137.3 (C-8a), 131.2 (C-1), 129.8 (C-7), 127.6 (C-2), 119.2 (C-8), 115.8 (C-4a), 109.7 (C-6), 109.3 (C-3); HRFABMS  $m/z$  317.0778  $[\text{M-H}]^+$  (calcd for  $\text{C}_{20}\text{H}_{13}\text{O}_4$ , 317.0773)

**Scheme S1.** Fractionation schemes of *Annulohypoxyton annulatum*

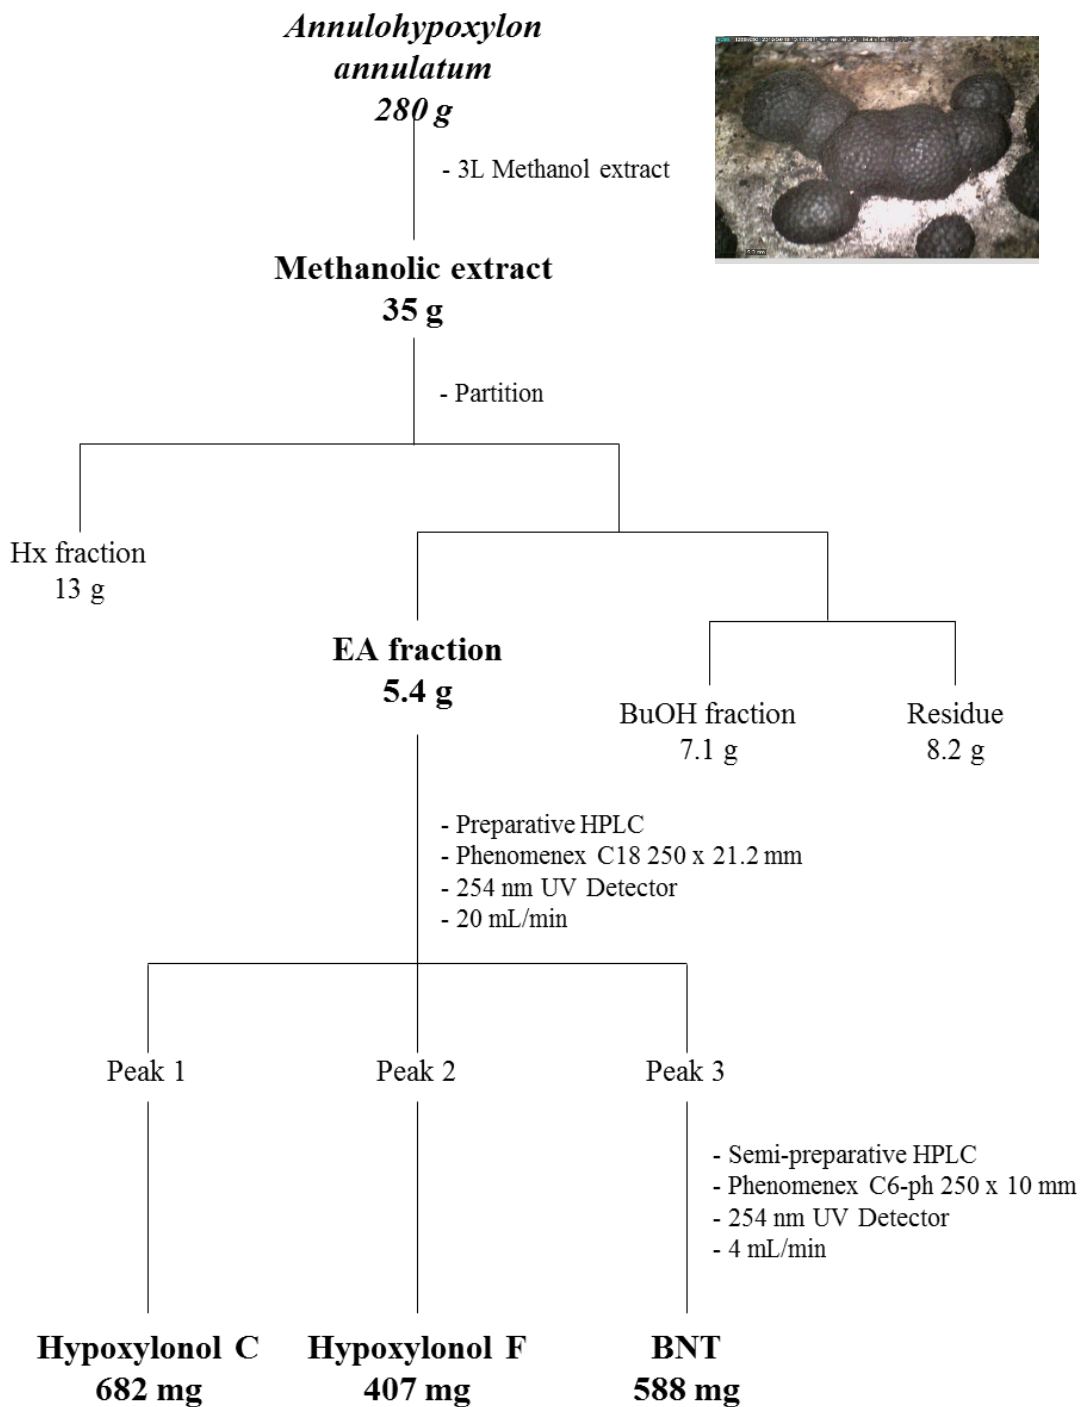

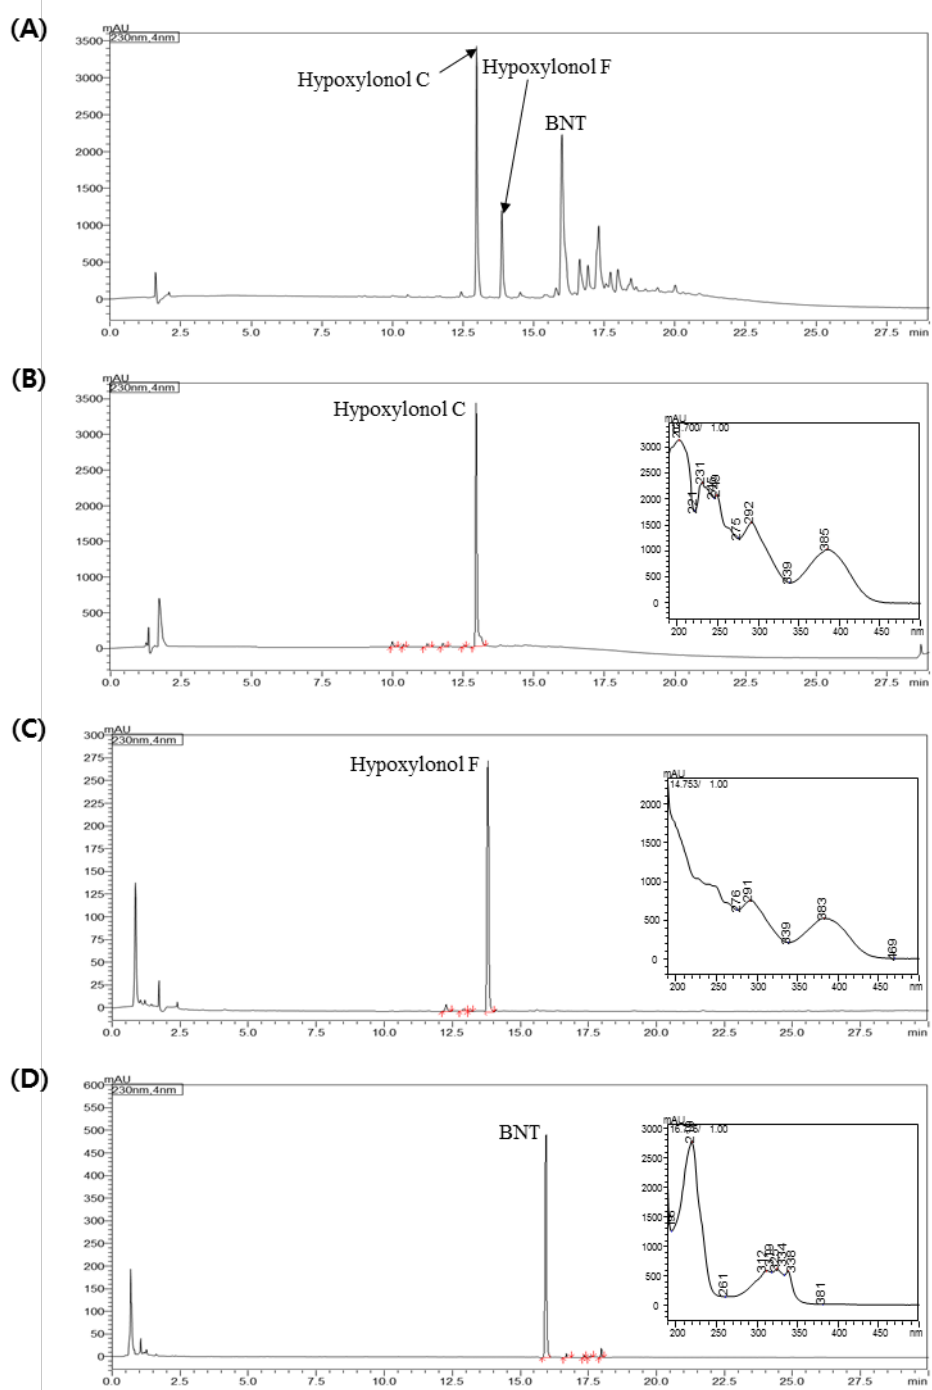

**Figure S1.** HPLC chromatograms of *Annulohypoxyton annulatum* extract (A), Hypoxylonol C (B), Hypoxylonol F (C), BNT (D).

HF-RP4-1-P.ESP

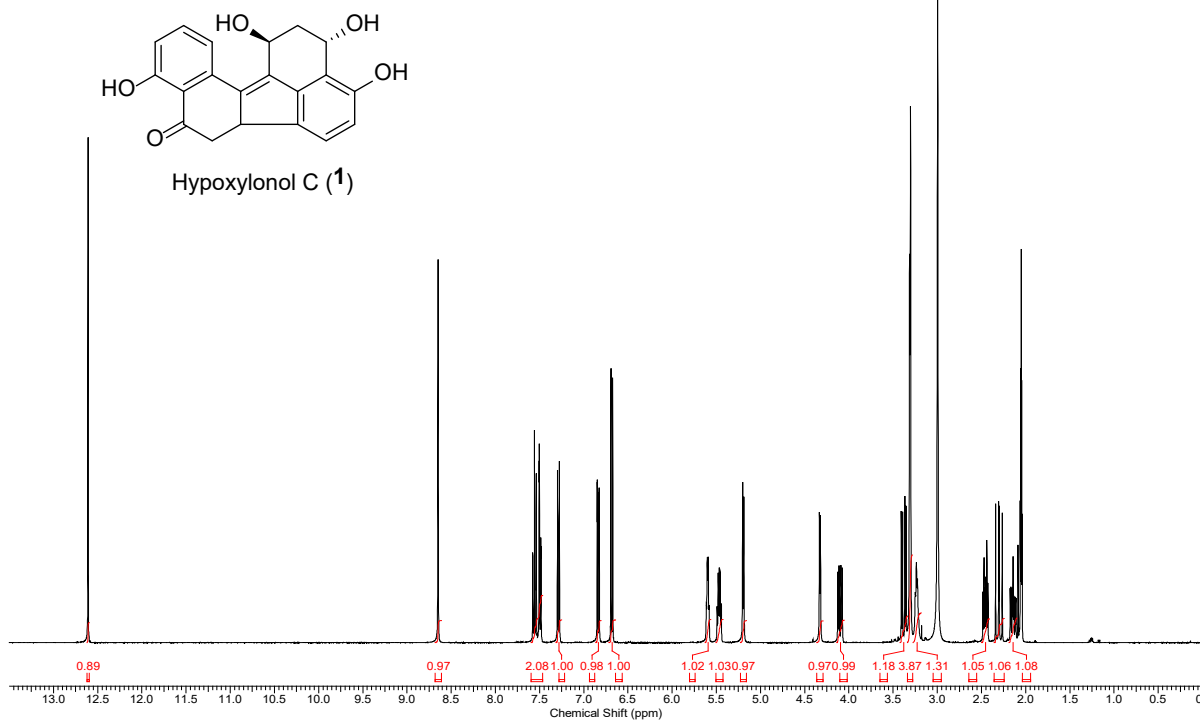

Figure S2. <sup>1</sup>H NMR spectrum of hypoxylonol C (1)

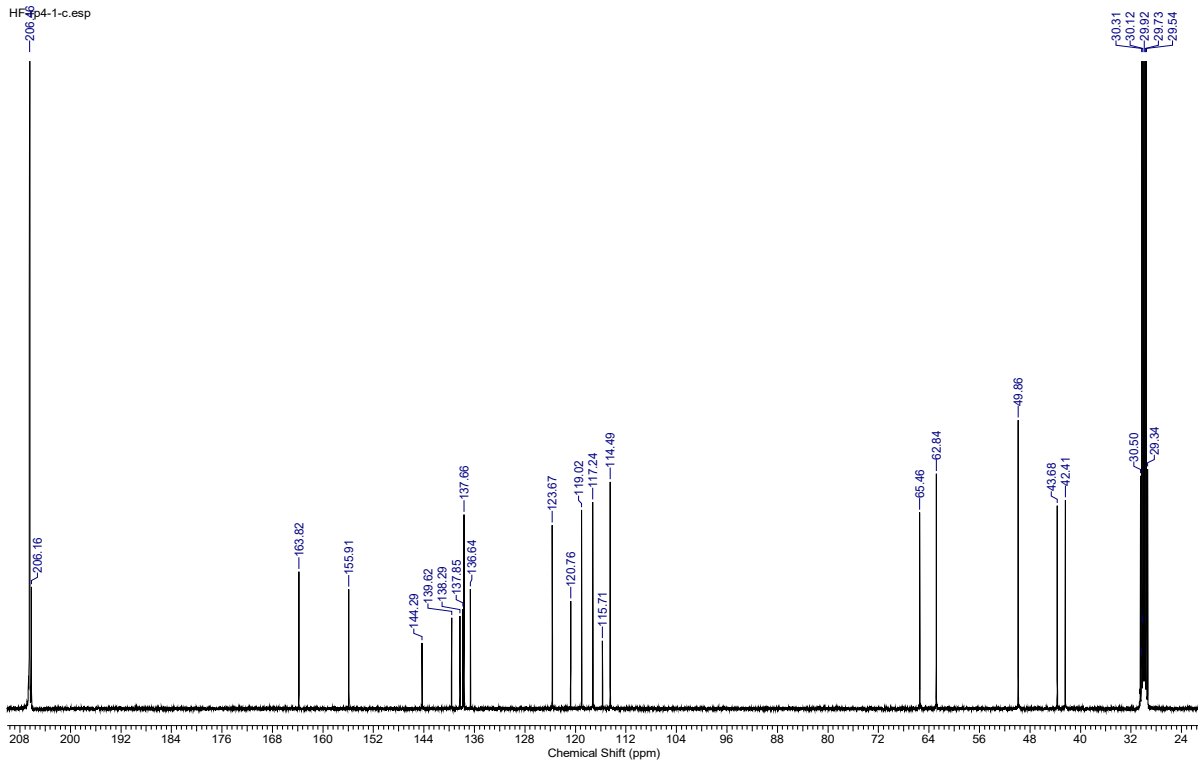

Figure S3. <sup>13</sup>C NMR spectrum of hypoxylonol C (1)

[ Mass Spectrum ]  
Data : KIST\_known\_001

Sample : -

Note : -

Inlet : Direct

Ion Mode : EI-

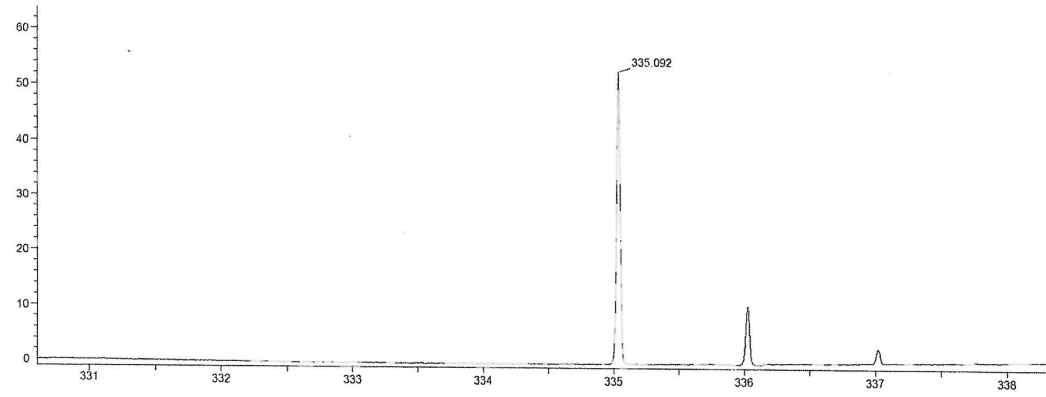

[ Theoretical Ion Distribution ]

Molecular Formula : C<sub>20</sub> H<sub>15</sub> O<sub>5</sub> [M-H]<sup>-</sup>

( m/z 335.0919, MW 335.3341 )

Base Peak : 335.0919, Averaged MW : 335.3145(a), 335.3316(w)

| m/z      | INT      |       |
|----------|----------|-------|
| 335.0919 | 100.0000 | ***** |
| 336.0942 | 21.4650  | ***** |
| 337.0968 | 2.1852   | **    |
| 338.0991 | 0.2468   |       |
| 339.1104 | 0.0214   |       |

**Figure S4.** HRMS of hypoxylonol C (1)

HF-RP6-2-P.ESP

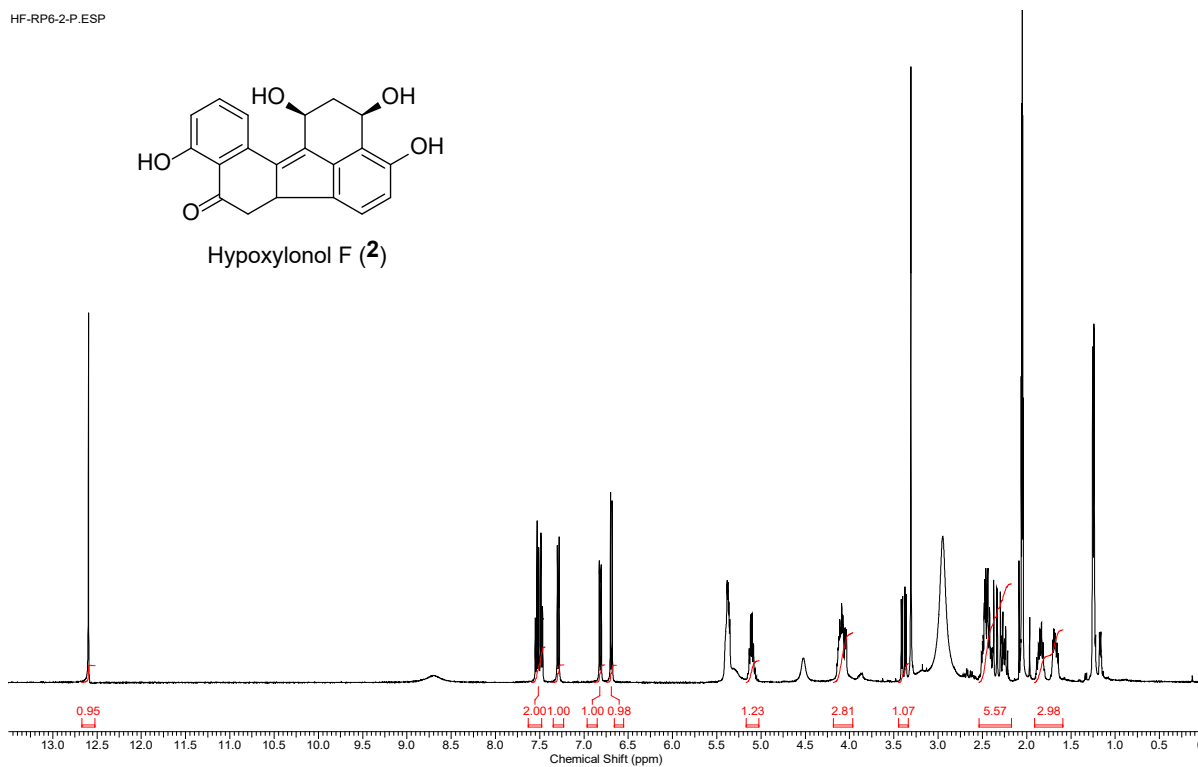

Figure S5. <sup>1</sup>H NMR NMR spectrum of hypoxylonol F (2)

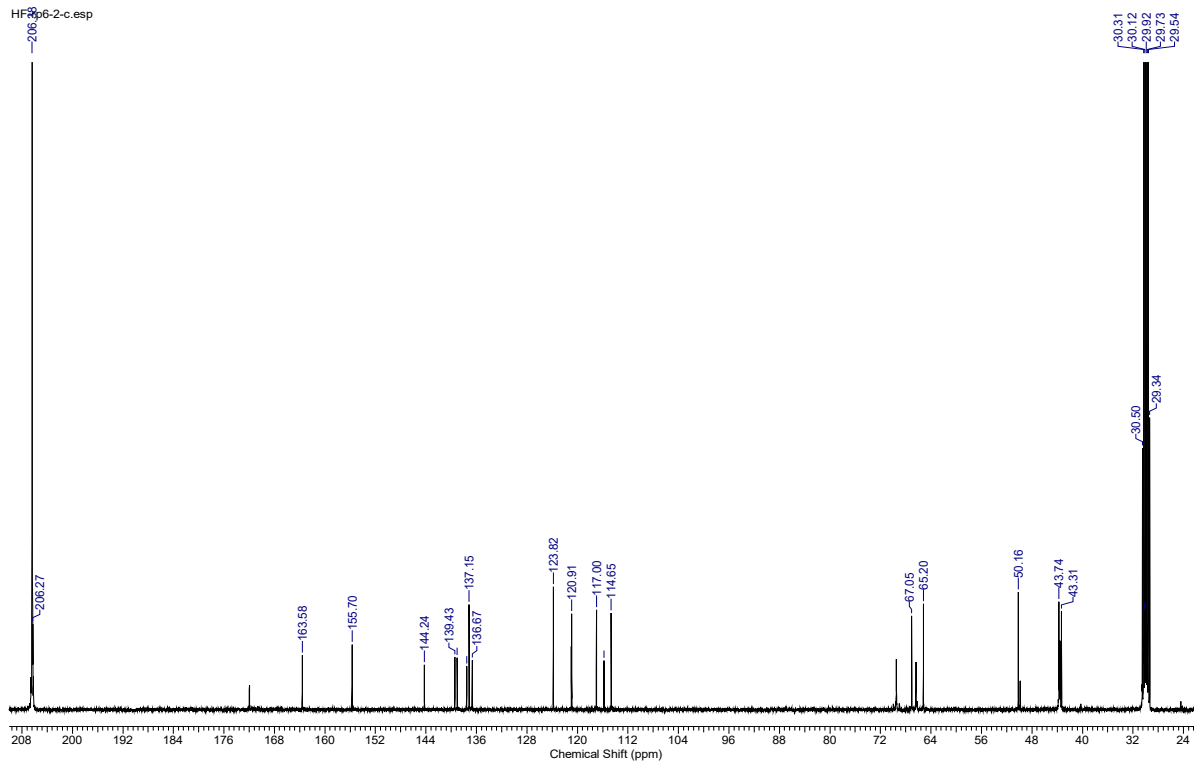

Figure S6. <sup>13</sup>C NMR NMR spectrum of hypoxylonol F (2)

[ Mass Spectrum ]  
Data : KIST\_known\_002  
Sample : -  
Note : -

Inlet : Direct

Ion Mode : EI+

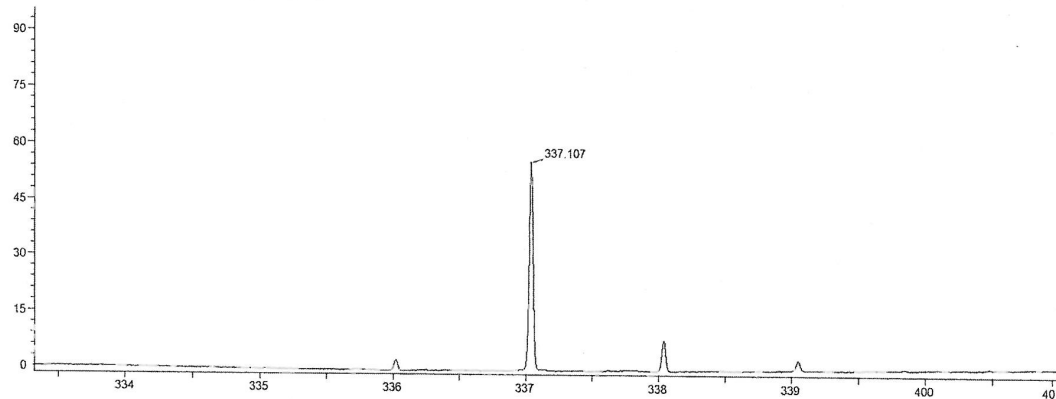

[ Theoretical Ion Distribution ]

Molecular Formula : C<sub>20</sub> H<sub>17</sub> O<sub>5</sub> [M+H]<sup>+</sup>

( m/z 337.1074, MW 337.3511 )

Base Peak : 337.1074, Averaged MW : 337.3445(a), 337.3496(w)

| m/z      | INT      |       |
|----------|----------|-------|
| 337.1074 | 100.0000 | ***** |
| 338.1081 | 21.9650  | ***** |
| 339.1088 | 2.2852   | **    |
| 400.1094 | 0.1975   |       |
| 401.1102 | 0.0182   |       |

**Figure S7. HRMS of hypoxylonol F (2)**



BNT-p.esp

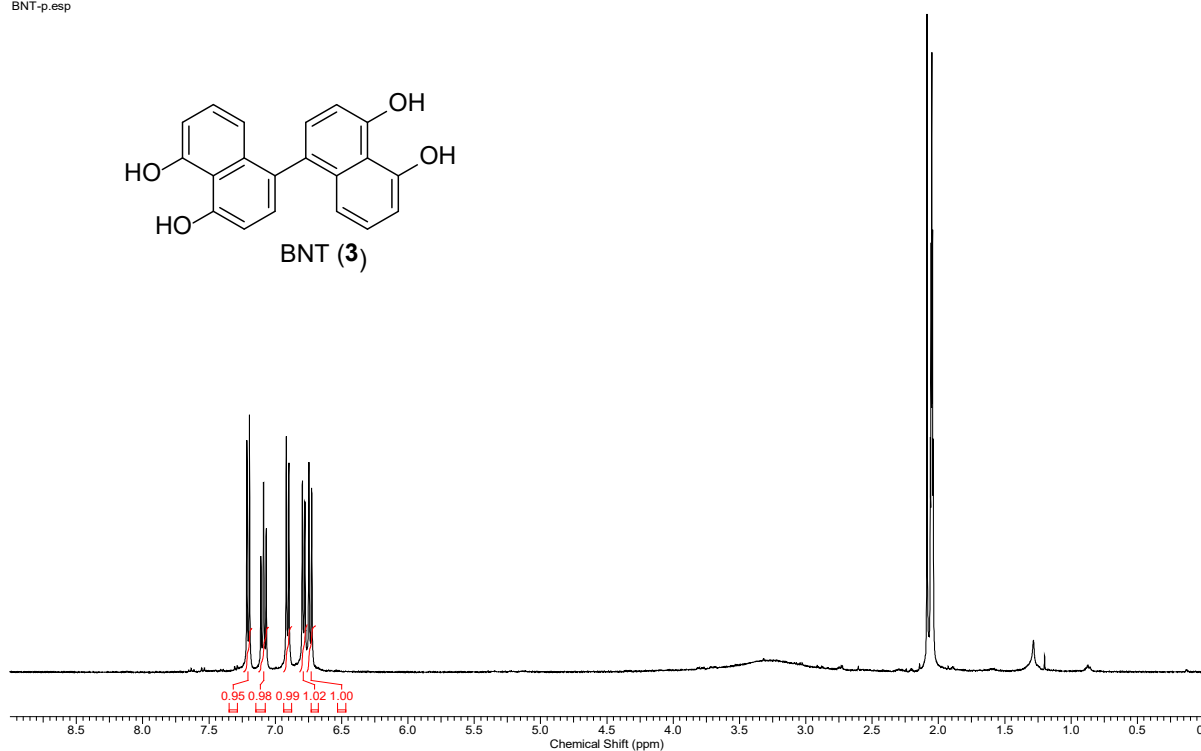

Figure S8. <sup>1</sup>H NMR NMR spectrum of BNT (3)

BNT-c.001.1r.esp

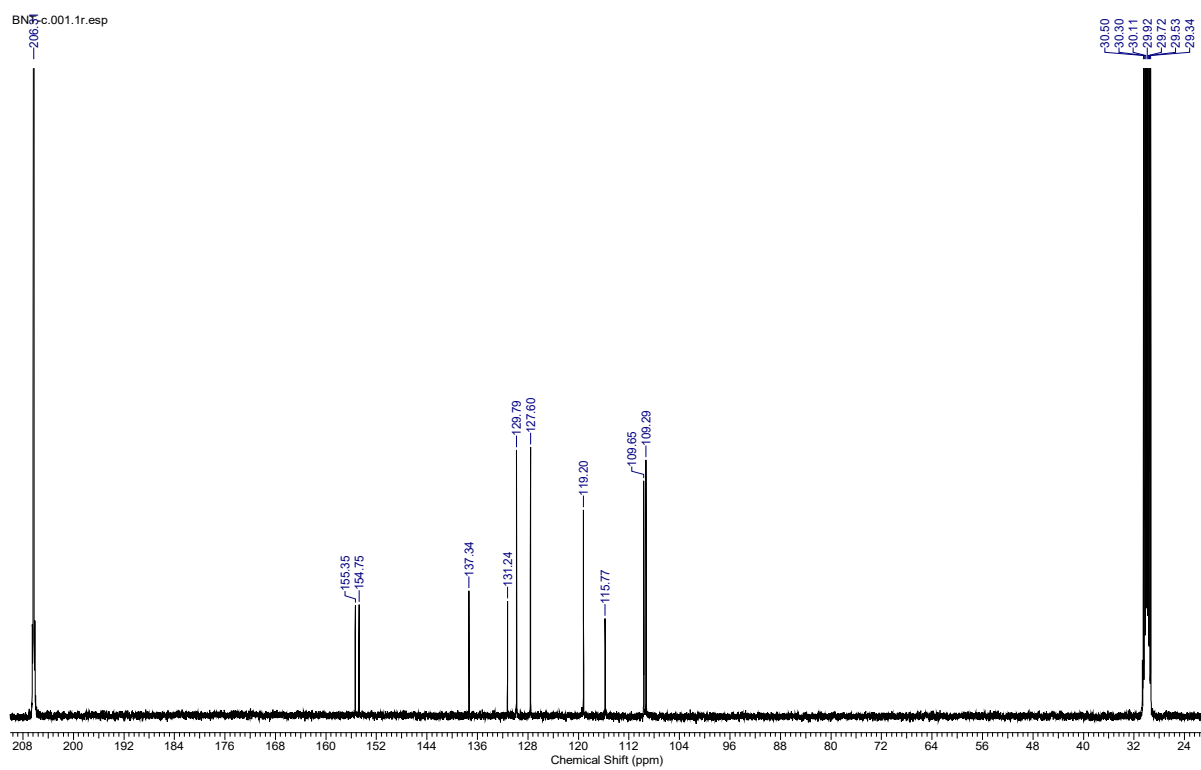

Figure S9. <sup>13</sup>C NMR NMR spectrum of BNT (3)

[ Mass Spectrum ]  
 Data : KIST\_known\_003  
 Sample : -  
 Note : -  
 Inlet : Direct

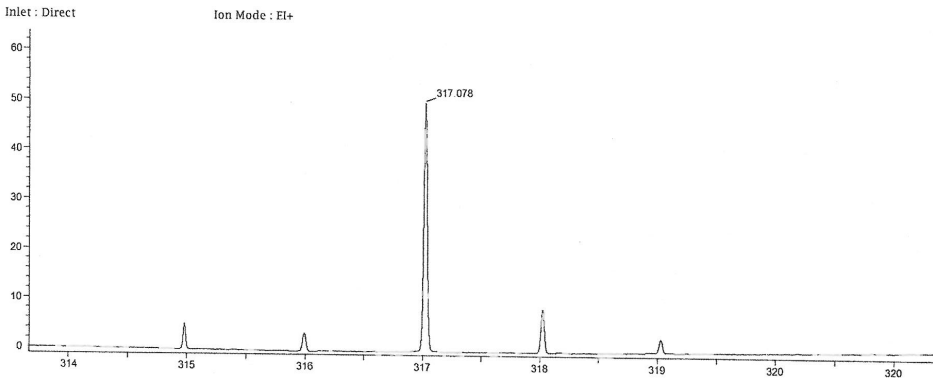

[ Theoretical Ion Distribution ]

Molecular Formula : C<sub>20</sub> H<sub>13</sub> O<sub>4</sub> [M+H]<sup>+</sup>

(m/z 317.0778, MW 317.3199)

Base Peak : 317.0778, Averaged MW : 317.3045(a), 317.3156(w)

| m/z      | INT      |       |
|----------|----------|-------|
| 317.0778 | 100.0000 | ***** |
| 318.0792 | 20.8460  | ***** |
| 319.0808 | 1.9912   | **    |
| 320.0821 | 0.2237   |       |
| 321.0834 | 0.0197   |       |

**Figure S10. HRMS of BNT (3)**

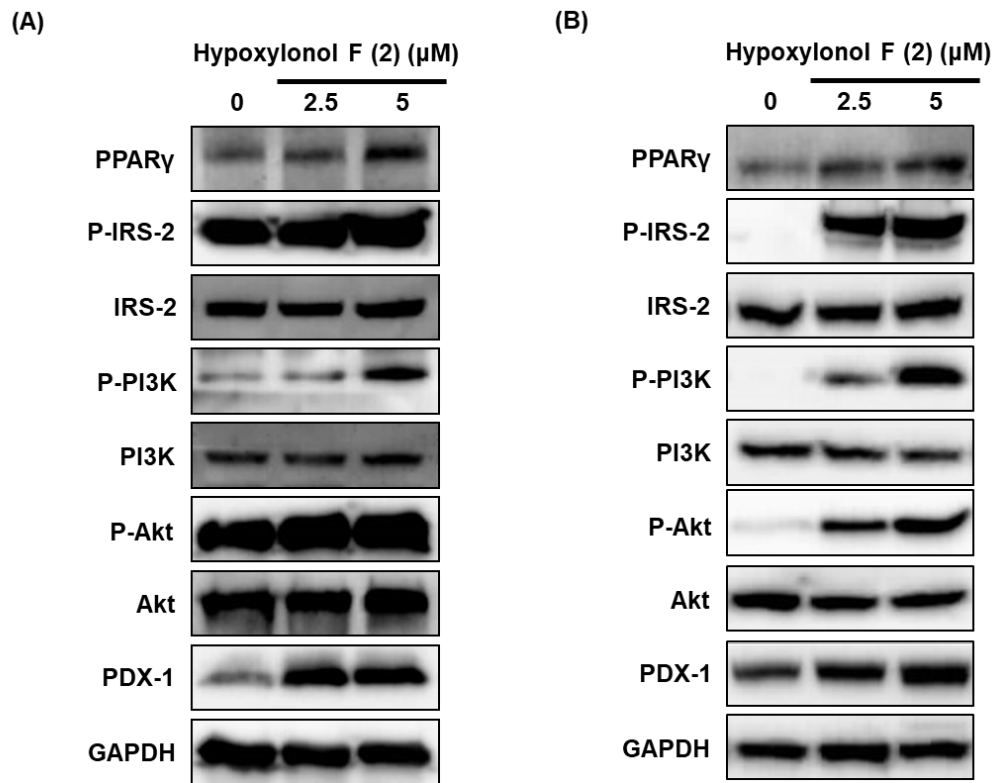

**Figure S11.** Effect of hypoxylonol F (2) on the protein expression levels of PPAR $\gamma$ , P-IRS-2, IRS-2, P-PI3K, PI3K, P-Akt (Ser473), Akt, and PDX-1 in INS-1 cells.
